# Supplementary material for: Cu-MOF: an efficient heterogeneous catalyst for the synthesis of symmetric anhydrides via the C–H bond activation of aldehydes
Source: Royal Society of Chemistry journal article supplement (doi:10.1039/c8ra03870h), 2018-01-01
Supplement: c8ra03870h1.pdf [file c8ra03870h1.pdf]

## Supporting Information

### **Cu-MOF: An Efficient Heterogeneous Catalyst for the Synthesis of Symmetric Anhydrides *via* C-H Bond Activation of Aldehydes**

Zahra Ahmadzadeh,<sup>a</sup> Javad Mokhtari,<sup>\*a</sup> and Morteza Rouhani <sup>a</sup>

<sup>a</sup> Department of Chemistry, Science and Research Branch, Islamic Azad University, P.O. Box 14515/775, Tehran, Iran. Corresponding author e-mail address: j.mokhtari@srbiau.ac.ir

### Selected Spectra Data:

**Benzoic anhydride (2a):** yield = 82%; Liquid,  $^1\text{H}$  NMR (300 MHz,  $\text{CDCl}_3$ ):  $\delta$  7.46-7.51 (m, 4H, CH of Ar), 7.60-7.65 (m, 2H, CH of Ar), 8.13 (d, 4H,  $^3J = 7.86$  Hz). Anal. Calcd. for  $\text{C}_{14}\text{H}_{10}\text{O}_3$  (226.23): C, 74.33; H, 4.46. Found: C, 74.35; H, 4.47.

**4-Nitrobenzoic anhydride (2g):** yield = 68%; mp: 188-190°C,  $^1\text{H}$  NMR (300 MHz,  $\text{CDCl}_3$ ):  $\delta$  8.14 (d, 4H,  $^3J = 8.9$  Hz, CH of Ar), 8.26 (d, 4H,  $^3J = 8.9$  Hz, CH of Ar). Anal. Calcd. for  $\text{C}_{14}\text{H}_8\text{N}_2\text{O}_7$  (316.23): C, 53.18; H, 2.55; N, 8.86%. Found: C, 53.21; H, 2.58; N, 8.87%.

**4-hydroxy-3-methoxybenzoic anhydride (2l):** yield = 73%;  $^1\text{H}$  NMR (300 MHz,  $\text{CDCl}_3$ ):  $\delta$  3.98 (s, 6H, MeO), 6.17 (bs, 2H, OH), 7.05 (d, 2H,  $^3J = 8.4$  Hz, CH of Ar), 7.43-7.45 (m, 4H, CH of Ar). Anal. Calcd. for  $\text{C}_{16}\text{H}_{14}\text{O}_7$  (318.28): C, 60.38; H, 4.43. Found: C, 60.4; H, 4.46.

**4-hydroxybenzoic anhydride (2k):** yield = 70%;  $^1\text{H}$  NMR (300 MHz,  $\text{CDCl}_3$ ):  $\delta$  5.6 (bs, 2H, OH), 6.95 (d, 4H,  $^3J = 8.6$  Hz, CH of Ar), 7.82 (d, 4H,  $^3J = 8.6$  Hz, CH of Ar). Anal. Calcd. for  $\text{C}_{14}\text{H}_{10}\text{O}_5$  (258.23): C, 65.12; H, 3.90. Found: C, 65.15; H, 3.94.

### Isotherm Linear Plot

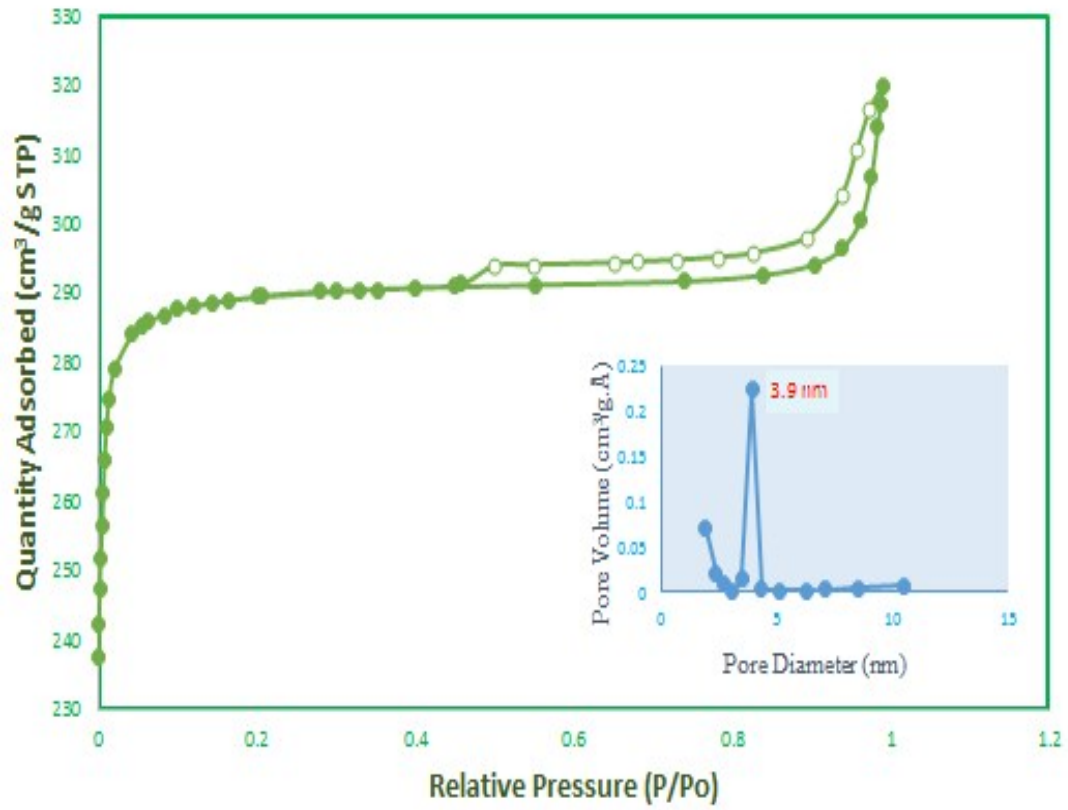

**Figure S1.** The N<sub>2</sub> adsorption–desorption isotherms of Cu<sub>2</sub>(BDC)<sub>2</sub>(DABCO)

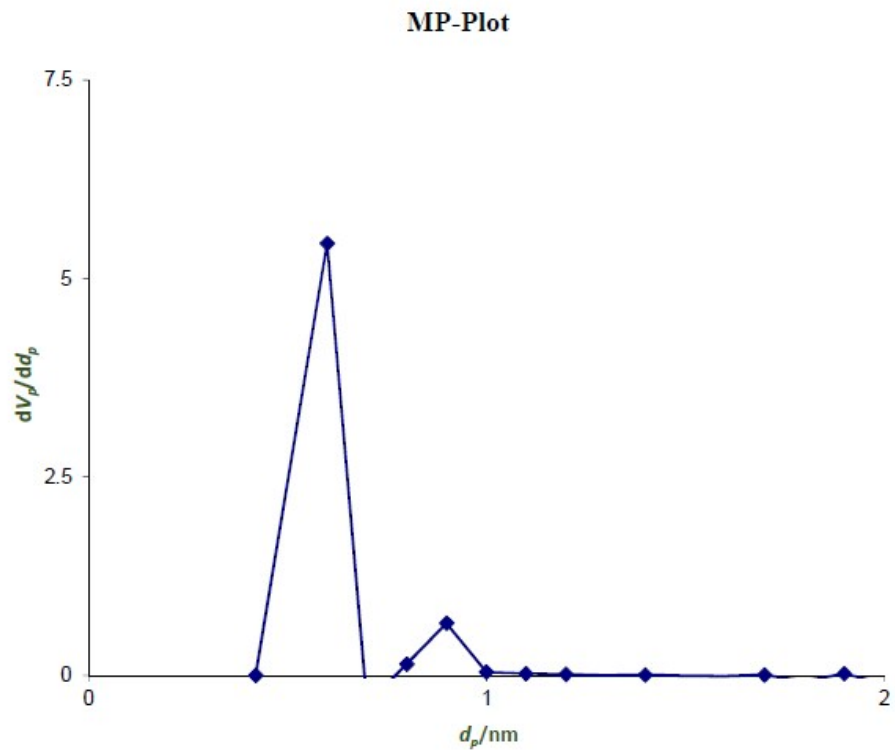

**Figure S2.** MP-Plot of the synthesized  $\text{Cu}_2(\text{BDC})_2(\text{DABCO})$

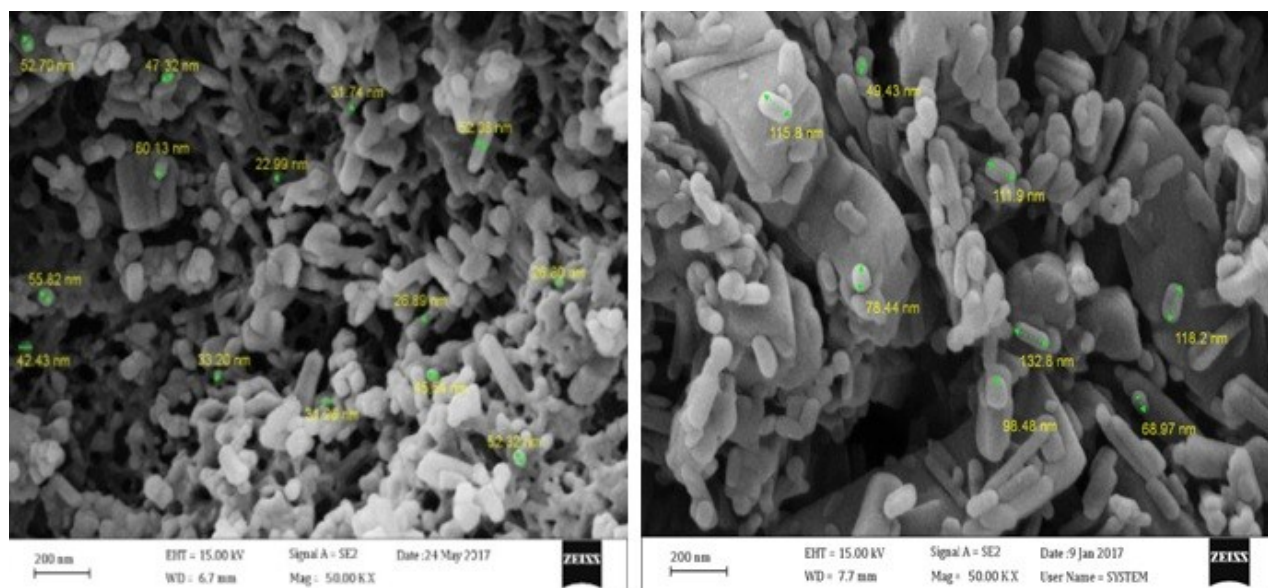

**Figure S3.** FE-SEM images of fresh  $\text{Cu}_2(\text{BDC})_2\text{DABCO}$  (left) and FE-SEM images of recycled  $\text{Cu}_2(\text{BDC})_2\text{DABCO}$  (right)

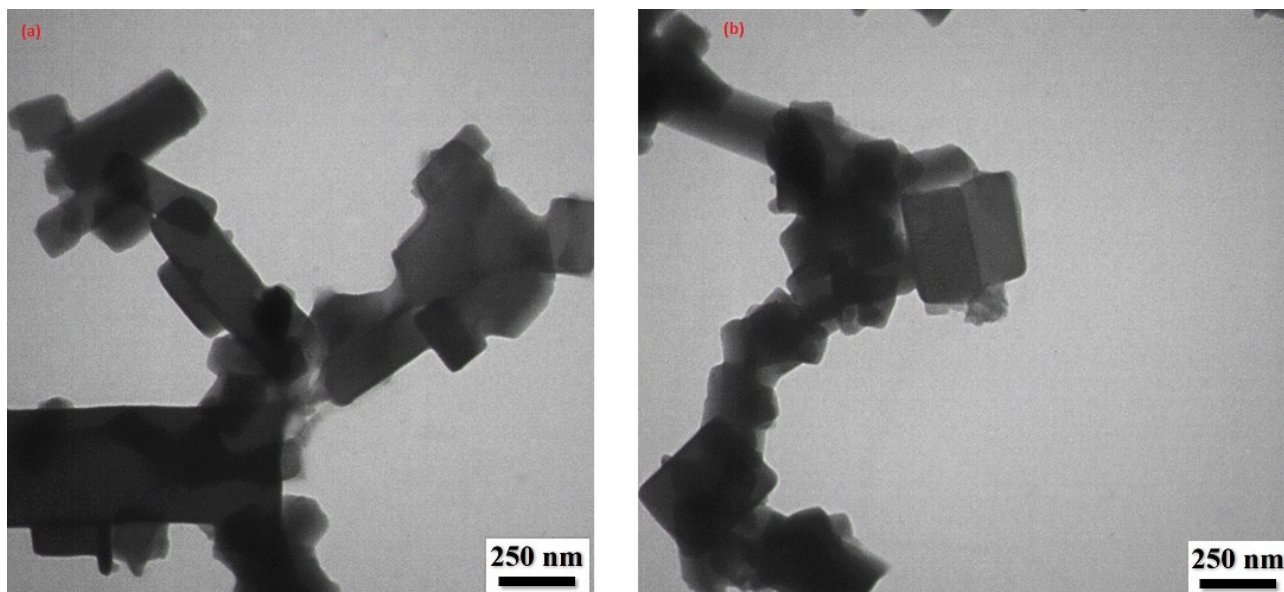

**Figure S4.** (left) TEM image of fresh  $\text{Cu}_2(\text{BDC})_2(\text{DABCO})$ . (Right) TEM image of recycled  $\text{Cu}_2(\text{BDC})_2(\text{DABCO})$

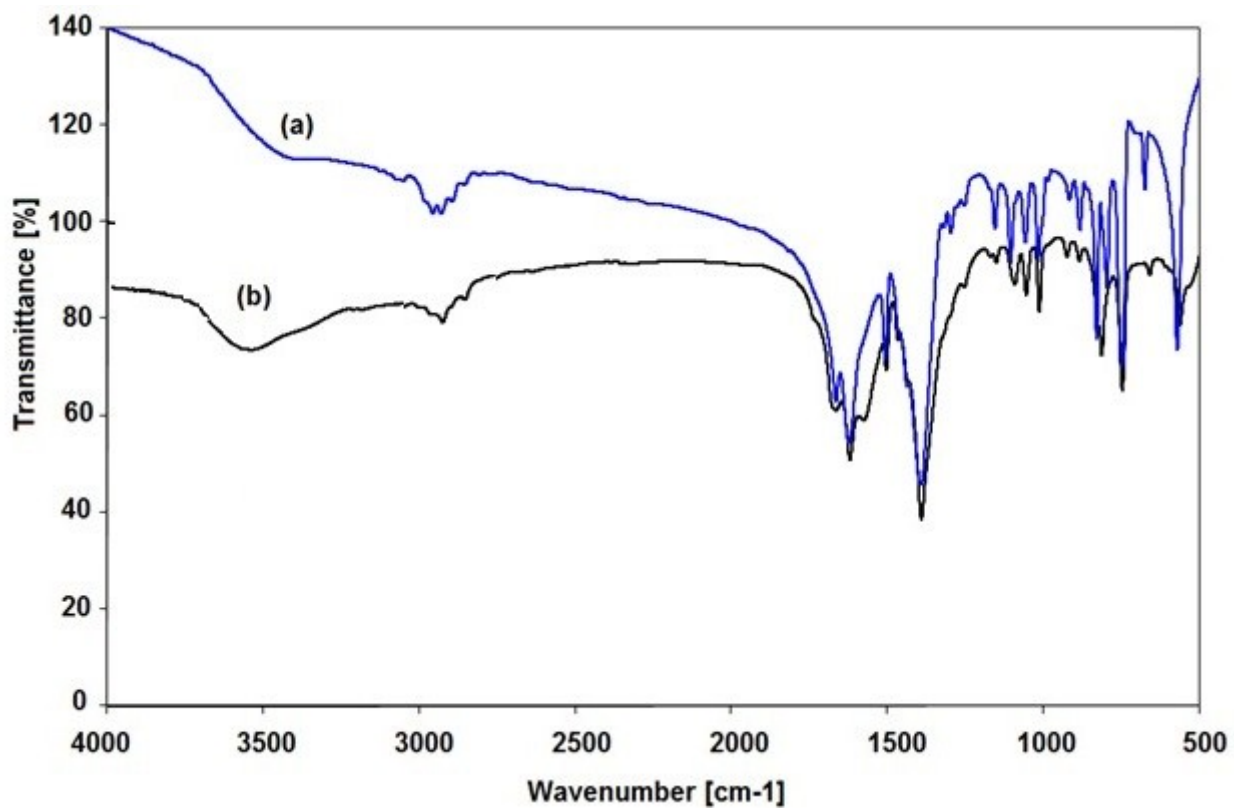

**Figure S5.** (a) FT-IR of fresh  $\text{Cu}_2(\text{BDC})_2(\text{DABCO})$  (b) recycled  $\text{Cu}_2(\text{BDC})_2(\text{DABCO})$

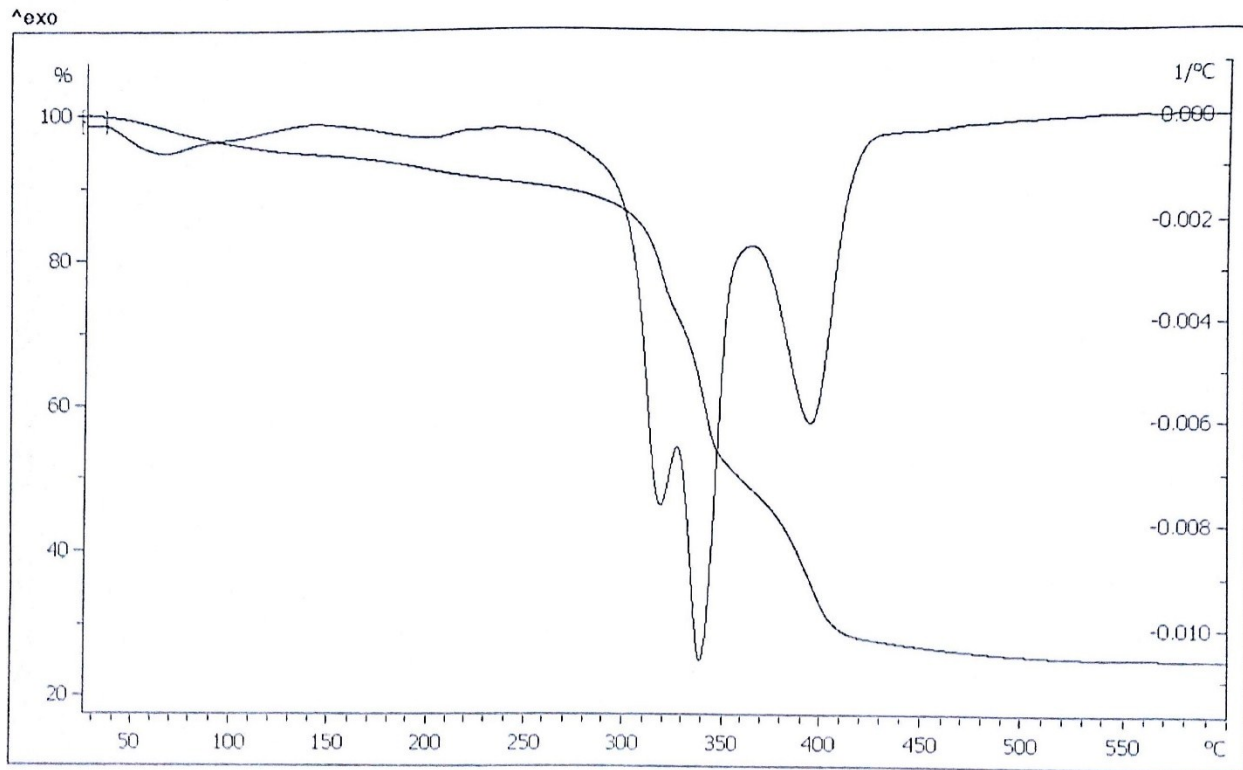

**Figure S6.** TGA spectra of  $\text{Cu}_2(\text{BDC})_2(\text{DABCO})$



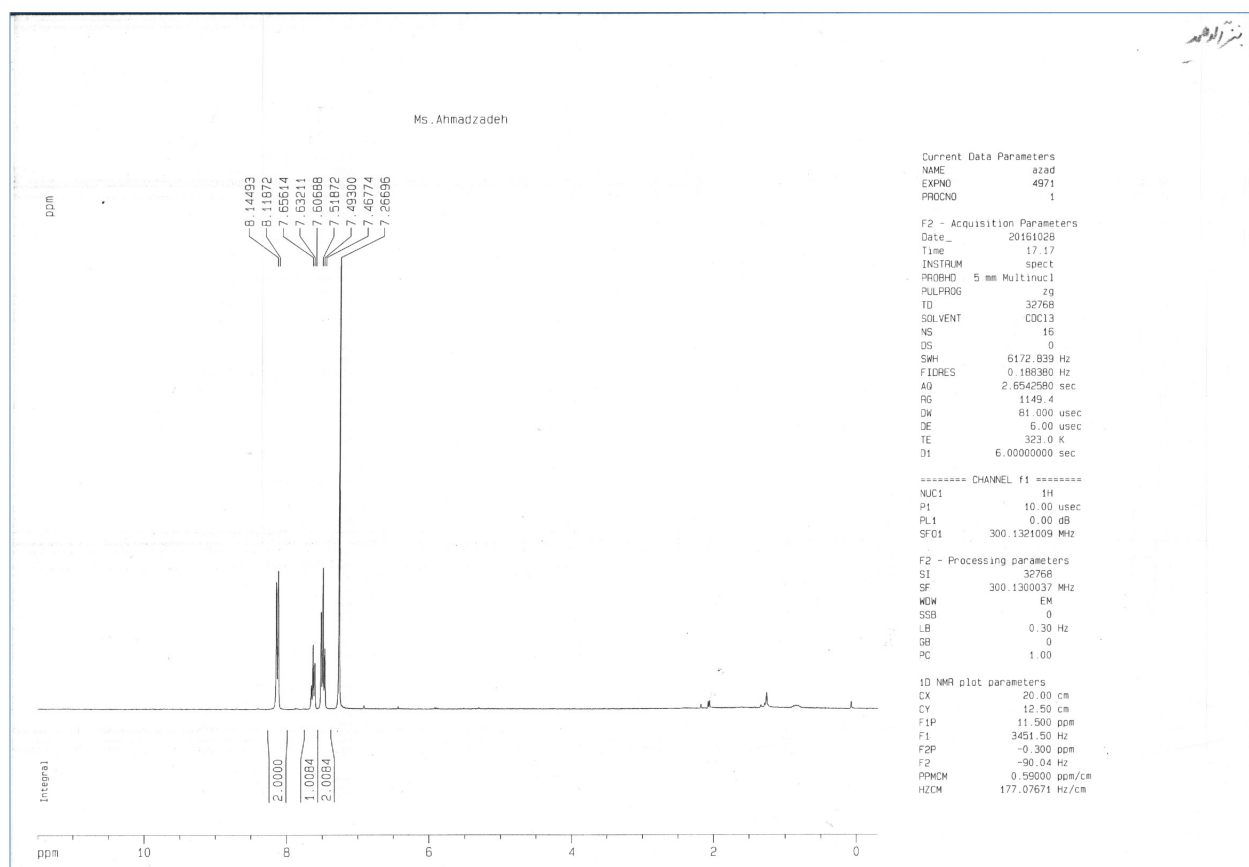

Figure S7. <sup>1</sup>H-NMR of Benzoic anhydride

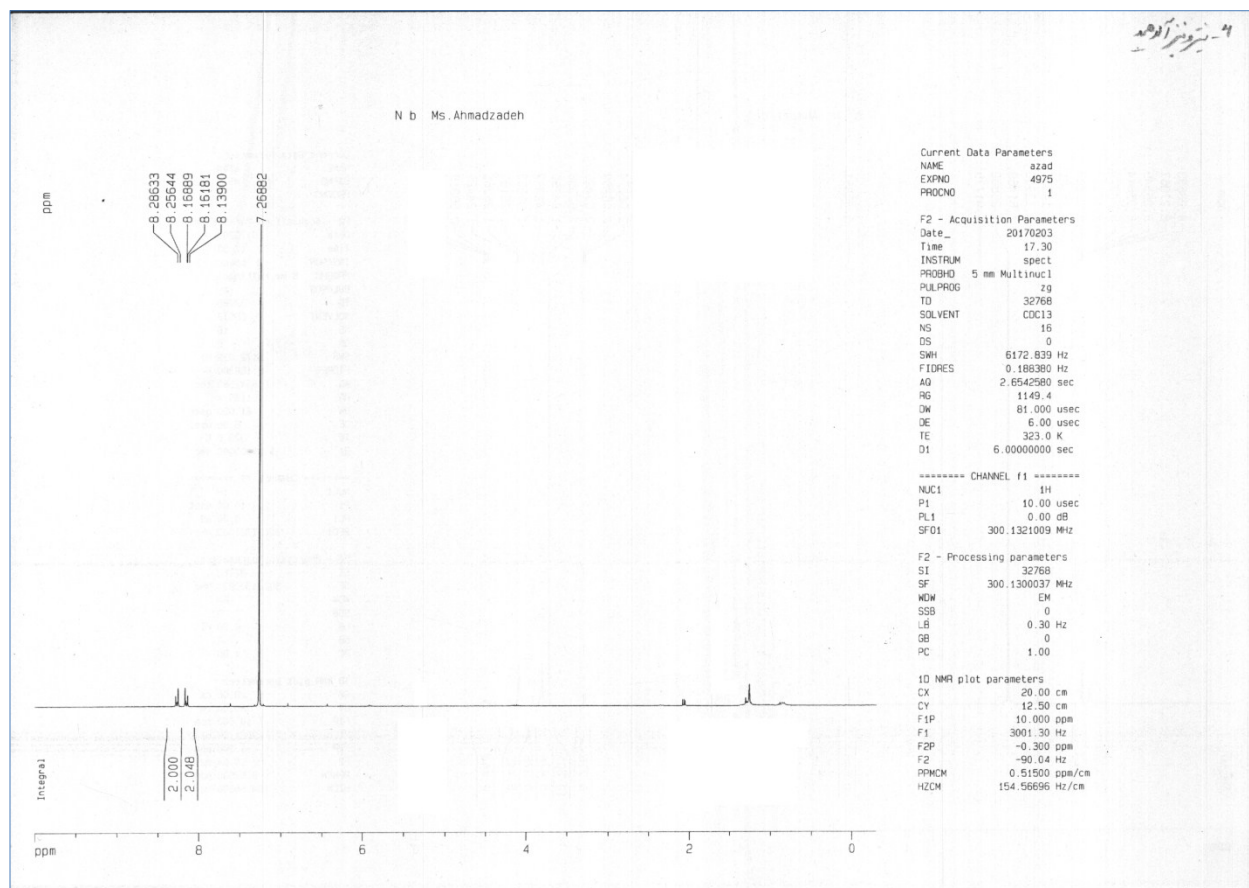

**Figure S8.**  $^1\text{H-NMR}$  of 4-nitrobenzoic anhydride

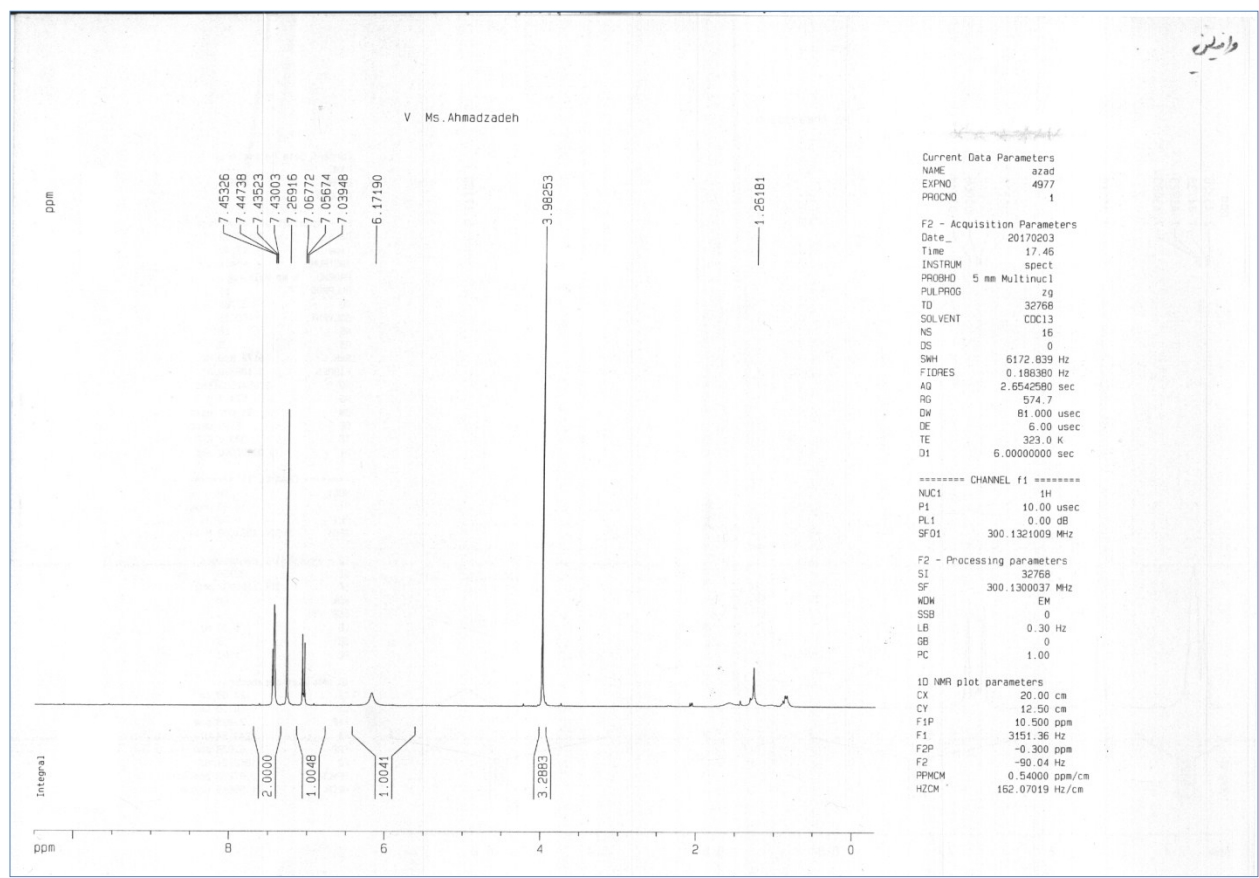

Figure S9. <sup>1</sup>H-NMR of 4-hydroxy-3-methoxybenzoic anhydride

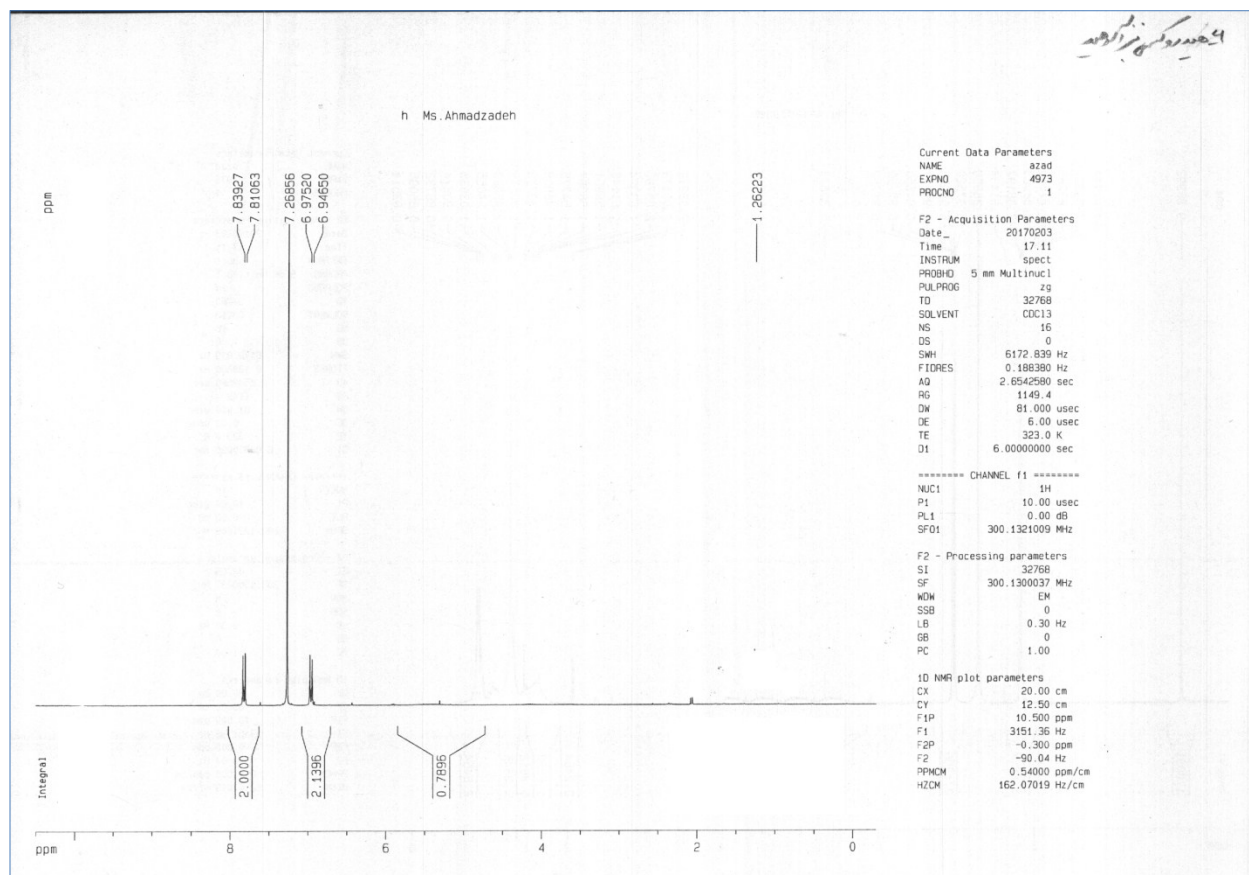

**Figure S10.**  $^1\text{H-NMR}$  of 4-hydroxybenzoic anhydride
